# Supplementary material for: Alternative Mating Tactics in Male Chameleons (Chamaeleo chamaeleon) Are Evident in Both Long-Term Body Color and Short-Term Courtship Pattern
Source: PubMed Central journal article supplement (PMC4943735; doi:10.1371/journal.pone.0159032), 2016-07-13
Supplement: pone.0159032.s003.pdf [file pone.0159032.s003.pdf]

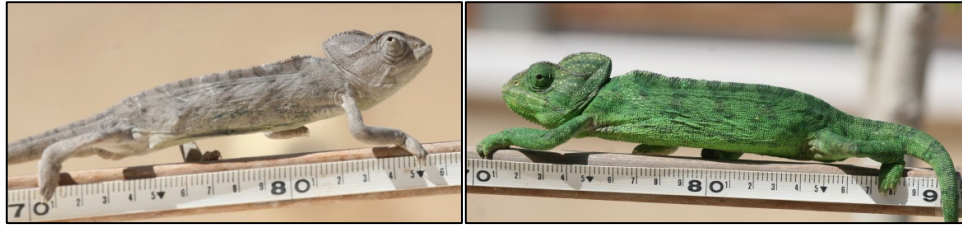

Fig. S3: Recaptured male that had shifted between body color morphs. On the left, the male is in a brown morph during a second or third breeding season, and on the right the same male in a green morph during the following breeding season.
